# Supplementary material
Source: PubMed Central journal article supplement (PMC8842836)
Supplement: NIHMS1777378-supplement-Supplementary_Material.pdf [file NIHMS1777378-supplement-Supplementary_Material.pdf]

**Supplementary Table 1: Preoperative Anticoagulation and INTERMACS Profile**

| <b>Preoperative Coagulation</b> | <b>Control<br/>(n=237)</b> | <b>FEIBA<br/>(n=82)</b> | <b>p-value</b> |
|---------------------------------|----------------------------|-------------------------|----------------|
| Aspirin                         | 106 (44.7%)                | 45 (54.9%)              | 0.112          |
| Warfarin                        | 69 (29.1%)                 | 25 (30.5%)              | 0.814          |
| Lovenox                         | 20 (8.4%)                  | 9 (11.0%)               | 0.491          |
| DOAC                            | 21 (8.9%)                  | 7 (8.5%)                | 0.929          |
| <b>INTERMACS Profile</b>        |                            |                         | 0.307          |
| Profile 1                       | 36 (15.2%)                 | 18 (22.0%)              | 0.164          |
| Profile 2                       | 76 (32.1%)                 | 25 (30.5%)              | 0.904          |
| Profile 3                       | 73 (30.8%)                 | 17 (20.7%)              | 0.121          |
| Profile 4                       | 44 (18.6%)                 | 15 (18.3%)              | 0.944          |
| Profile 5                       | 5 (2.1%)                   | 3 (3.7%)                | 0.443          |
| Profile 6                       | 1 (0.4%)                   | 0 (0.0%)                | 0.555          |
| Profile 7                       | 0 (0.0%)                   | 1 (1.2%)                | 0.089          |

DOAC= direct oral anticoagulant, INTERMACS profile= Interagency Registry for Mechanically Assisted Circulatory Support profile. Categorical variables analyzed by Fischer exact test for  $n \leq 5$  and chi-squared test for  $n > 5$ . Categorical variables analyzed by Fischer exact for  $n \leq 5$  and chi-squared for  $n > 5$ . Continuous variables analyzed by two-sided t-test with standard deviation ( $\pm$  SD).

**Supplementary Table 2: Blood Products Required prior to FEIBA Administration**

| <b>FEIBA Cohort<br/>(n=82)</b> | <b>Mean (<math>\pm</math>SD)</b> | <b>95% CI</b> | <b>Min-Max</b> |
|--------------------------------|----------------------------------|---------------|----------------|
| pRBCs (units)                  | 5.57 ( $\pm$ 4.92)               | 4.49 – 6.66   | 0.0 – 22.0     |
| FFP (units)                    | 6.48 ( $\pm$ 4.60)               | 5.46 – 7.49   | 0.0 – 23.0     |
| Platelets (units)              | 2.66 ( $\pm$ 1.58)               | 2.31 – 3.01   | 0.0 – 9.0      |
| Cryo (bags of 10 units)        | 1.90 ( $\pm$ 2.86)               | 1.27 – 2.53   | 0.0 – 20.0     |
| Total Blood Product            | 16.6 ( $\pm$ 10.4)               | 14.3 – 18.9   | 4.0 – 53.0     |

Includes blood products given intraoperatively and in the ICU within the first two days postoperatively before FEIBA was administered for perioperative hemorrhage control. pRBC= units of packed red blood cells, FFP= units of fresh frozen plasma, Cryo = Cryoprecipitate bags (10 pooled units). SD = standard deviation, CI = confidence interval, Min = minimum, and Max = maximum.

**Supplementary Table 3: Timing of Thrombotic Events**

| <b>Patient ID #</b> | <b>FEIBA</b> | <b>Thrombotic Event #1</b> | <b>Days from Surgery</b> | <b>Thrombotic Event #2</b> | <b>Days from Surgery</b> |
|---------------------|--------------|----------------------------|--------------------------|----------------------------|--------------------------|
| 11                  | Yes          | DVT                        | 10                       |                            |                          |
| 35                  | Yes          | DVT                        | 11                       |                            |                          |
| 43                  | No           | DVT                        | 7                        |                            |                          |
| 45                  | Yes          | DVT                        | 5                        |                            |                          |
| 63                  | Yes          | DVT                        | 8                        |                            |                          |
| 70                  | Yes          | DVT                        | 8                        |                            |                          |
| 79                  | No           | DVT                        | 3                        |                            |                          |
| 88                  | Yes          | DVT                        | 5                        |                            |                          |
| 125                 | No           | DVT                        | 5                        |                            |                          |
| 132                 | No           | DVT                        | 6                        |                            |                          |
| 152                 | No           | iCVA                       | 12                       |                            |                          |
| 170                 | No           | DVT                        | 11                       |                            |                          |
| 187                 | No           | DVT                        | 13                       |                            |                          |
| 190                 | Yes          | DVT                        | 4                        |                            |                          |
| 198                 | No           | iCVA                       | 10                       |                            |                          |
| 200                 | No           | iCVA                       | 3                        |                            |                          |
| 203                 | Yes          | DVT                        | 7                        |                            |                          |
| 209                 | No           | DVT                        | 5                        |                            |                          |
| 210                 | No           | iCVA                       | 8                        |                            |                          |
| 213                 | Yes          | DVT                        | 3                        |                            |                          |
| 230                 | No           | DVT                        | 8                        |                            |                          |
| 246                 | No           | PE                         | 9                        | DVT                        | 12                       |
| 247                 | No           | DVT                        | 13                       |                            |                          |
| 254                 | No           | DVT                        | 6                        |                            |                          |
| 259                 | No           | iCVA                       | 13                       |                            |                          |
| 260                 | No           | DVT                        | 10                       |                            |                          |
| 270                 | No           | DVT                        | 9                        |                            |                          |

DVT= deep vein thrombosis, Combo CVA= combination ischemic cerebrovascular accident with hemorrhagic conversion, PE= pulmonary embolism, iCVA= ischemic cerebrovascular accident, Pump Thrombus= pump thrombus requiring exchange.
